# Supplementary material for: Identification and Analysis of Differential miRNAs in PK-15 Cells after Foot-and-Mouth Disease Virus Infection
Source: PLoS One. 2014 Mar 27;9(3):e90865. doi: 10.1371/journal.pone.0090865 (PMC3968000; doi:10.1371/journal.pone.0090865)
Supplement: File S12 — KEGG Pathway annotations for the predicted target genes for different novel miRNA candidates. (XLSX) [file pone.0090865.s012.xlsx]

## Sheet: Sheet1
Pathway annotation of Sample _diff_miRNA_novel
#	Pathway	Sample1 (14644)	Sample2 (14835)	Pvalue	Qvalue	Pathway ID
1	Olfactory transduction	1252	1253	8.06282e-07	0.000221727	ko04740
2	RNA transport	254	254	0.036151	1	ko03013
3	Metabolic pathways	1450	1462	0.0548151	1	ko01100
4	Endocytosis	397	399	0.108732	1	ko04144
5	Biosynthesis of secondary metabolites	287	288	0.1115	1	ko01110
6	Tight junction	387	389	0.119016	1	ko04530
7	Bacterial invasion of epithelial cells	163	163	0.11956	1	ko05100
8	Regulation of actin cytoskeleton	371	373	0.137261	1	ko04810
9	Leukocyte transendothelial migration	251	252	0.161241	1	ko04670
10	Shigellosis	134	134	0.174762	1	ko05131
11	Pathogenic Escherichia coli infection	133	133	0.177063	1	ko05130
12	mRNA surveillance pathway	126	126	0.19403	1	ko03015
13	NOD-like receptor signaling pathway	112	112	0.232969	1	ko04621
14	Glycerophospholipid metabolism	100	100	0.27247	1	ko00564
15	Axon guidance	285	287	0.281602	1	ko04360
16	RIG-I-like receptor signaling pathway	95	95	0.290833	1	ko04622
17	Prion diseases	94	94	0.294651	1	ko05020
18	Inositol phosphate metabolism	92	92	0.302437	1	ko00562
19	mTOR signaling pathway	91	91	0.306406	1	ko04150
20	Cell cycle - yeast	91	91	0.306406	1	ko04111
21	Cardiac muscle contraction	90	90	0.310427	1	ko04260
22	Complement and coagulation cascades	183	184	0.311404	1	ko04610
23	Protein digestion and absorption	180	181	0.320117	1	ko04974
24	Chagas disease (American trypanosomiasis)	177	178	0.329027	1	ko05142
25	Notch signaling pathway	84	84	0.33568	1	ko04330
26	Oocyte meiosis	174	175	0.338136	1	ko04114
27	Valine, leucine and isoleucine degradation	80	80	0.353641	1	ko00280
28	Purine metabolism	255	257	0.353672	1	ko00230
29	Lysine degradation	79	79	0.358278	1	ko00310
30	Glycerolipid metabolism	78	78	0.362976	1	ko00561
31	Adherens junction	166	167	0.363408	1	ko04520
32	Cell adhesion molecules (CAMs)	251	253	0.364198	1	ko04514
33	Wnt signaling pathway	249	251	0.369541	1	ko04310
34	Toll-like receptor signaling pathway	164	165	0.369952	1	ko04620
35	Phosphatidylinositol signaling system	164	165	0.369952	1	ko04070
36	Microbial metabolism in diverse environments	244	246	0.383132	1	ko01120
37	Lysosome	159	160	0.386708	1	ko04142
38	N-Glycan biosynthesis	73	73	0.387402	1	ko00510
39	Aminoacyl-tRNA biosynthesis	73	73	0.387402	1	ko00970
40	Phagosome	323	326	0.392021	1	ko04145
41	Meiosis - yeast	72	72	0.39248	1	ko04113
42	Basal transcription factors	71	71	0.397624	1	ko03022
43	Insulin signaling pathway	238	240	0.399878	1	ko04910
44	ABC transporters	69	69	0.408114	1	ko02010
45	Fat digestion and absorption	69	69	0.408114	1	ko04975
46	Amino sugar and nucleotide sugar metabolism	68	68	0.413461	1	ko00520
47	Pyruvate metabolism	66	66	0.424367	1	ko00620
48	Tyrosine metabolism	65	65	0.429927	1	ko00350
49	GnRH signaling pathway	146	147	0.432943	1	ko04912
50	Antigen processing and presentation	146	147	0.432943	1	ko04612
51	Arrhythmogenic right ventricular cardiomyopathy (ARVC)	142	143	0.447943	1	ko05412
52	Viral myocarditis	300	303	0.450008	1	ko05416
53	Ubiquitin mediated proteolysis	220	222	0.45288	1	ko04120
54	Basal cell carcinoma	61	61	0.452899	1	ko05217
55	Cysteine and methionine metabolism	61	61	0.452899	1	ko00270
56	Gastric acid secretion	140	141	0.455578	1	ko04971
57	Vascular smooth muscle contraction	215	217	0.468305	1	ko04270
58	MAPK signaling pathway	369	373	0.47304	1	ko04010
59	Glutathione metabolism	56	56	0.483339	1	ko00480
60	RNA degradation	132	133	0.487007	1	ko03018
61	Prostate cancer	130	131	0.495083	1	ko05215
62	Autoimmune thyroid disease	129	130	0.499153	1	ko05320
63	VEGF signaling pathway	127	128	0.507357	1	ko04370
64	Primary immunodeficiency	52	52	0.50915	1	ko05340
65	Ribosome biogenesis in eukaryotes	125	126	0.515645	1	ko03008
66	Carbohydrate digestion and absorption	51	51	0.515814	1	ko04973
67	Steroid hormone biosynthesis	51	51	0.515814	1	ko00140
68	Propanoate metabolism	51	51	0.515814	1	ko00640
69	Porphyrin and chlorophyll metabolism	50	50	0.522564	1	ko00860
70	Progesterone-mediated oocyte maturation	122	123	0.528232	1	ko04914
71	Thyroid cancer	49	49	0.529403	1	ko05216
72	Mineral absorption	47	47	0.543348	1	ko04978
73	Fc gamma R-mediated phagocytosis	191	193	0.546093	1	ko04666
74	Butanoate metabolism	45	45	0.557659	1	ko00650
75	Citrate cycle (TCA cycle)	45	45	0.557659	1	ko00020
76	Various types of N-glycan biosynthesis	44	44	0.564955	1	ko00513
77	Base excision repair	43	43	0.572345	1	ko03410
78	Drug metabolism - other enzymes	43	43	0.572345	1	ko00983
79	Alanine, aspartate and glutamate metabolism	43	43	0.572345	1	ko00250
80	Glycine, serine and threonine metabolism	42	42	0.579831	1	ko00260
81	T cell receptor signaling pathway	181	183	0.580046	1	ko04660
82	Staphylococcus aureus infection	110	111	0.580332	1	ko05150
83	Malaria	106	107	0.598273	1	ko05144
84	B cell receptor signaling pathway	106	107	0.598273	1	ko04662
85	Plant-pathogen interaction	39	39	0.60288	1	ko04626
86	Histidine metabolism	39	39	0.60288	1	ko00340
87	Cytokine-cytokine receptor interaction	244	247	0.60638	1	ko04060
88	Type I diabetes mellitus	104	105	0.60734	1	ko04940
89	Osteoclast differentiation	172	174	0.611171	1	ko04380
90	Fc epsilon RI signaling pathway	103	104	0.611897	1	ko04664
91	Nicotinate and nicotinamide metabolism	37	37	0.61875	1	ko00760
92	Amoebiasis	239	242	0.620969	1	ko05146
93	Bile secretion	101	102	0.621054	1	ko04976
94	Dilated cardiomyopathy	169	171	0.621639	1	ko05414
95	Arachidonic acid metabolism	99	100	0.630268	1	ko00590
96	Allograft rejection	97	98	0.639534	1	ko05330
97	Leishmaniasis	97	98	0.639534	1	ko05140
98	Pentose phosphate pathway	34	34	0.643338	1	ko00030
99	Epithelial cell signaling in Helicobacter pylori infection	96	97	0.644186	1	ko05120
100	Melanogenesis	162	164	0.64619	1	ko04916
101	Primary bile acid biosynthesis	33	33	0.651748	1	ko00120
102	beta-Alanine metabolism	33	33	0.651748	1	ko00410
103	Proximal tubule bicarbonate reclamation	33	33	0.651748	1	ko04964
104	Graft-versus-host disease	94	95	0.653525	1	ko05332
105	Galactose metabolism	32	32	0.660267	1	ko00052
106	Glycosylphosphatidylinositol(GPI)-anchor biosynthesis	32	32	0.660267	1	ko00563
107	Colorectal cancer	92	93	0.662907	1	ko05210
108	Hypertrophic cardiomyopathy (HCM)	157	159	0.663798	1	ko05410
109	Glycosaminoglycan degradation	31	31	0.668897	1	ko00531
110	Circadian rhythm - mammal	31	31	0.668897	1	ko04710
111	Renal cell carcinoma	90	91	0.672329	1	ko05211
112	Pancreatic secretion	154	156	0.674375	1	ko04972
113	Pentose and glucuronate interconversions	29	29	0.686496	1	ko00040
114	DNA replication	29	29	0.686496	1	ko03030
115	Pantothenate and CoA biosynthesis	28	28	0.695466	1	ko00770
116	Nitrogen metabolism	28	28	0.695466	1	ko00910
117	Neuroactive ligand-receptor interaction	279	283	0.699224	1	ko04080
118	alpha-Linolenic acid metabolism	27	27	0.704554	1	ko00592
119	Carbon fixation in photosynthetic organisms	27	27	0.704554	1	ko00710
120	Mucin type O-Glycan biosynthesis	27	27	0.704554	1	ko00512
121	Glycosaminoglycan biosynthesis - chondroitin sulfate	27	27	0.704554	1	ko00532
122	Type II diabetes mellitus	82	83	0.710318	1	ko04930
123	Glycosaminoglycan biosynthesis - heparan sulfate	26	26	0.71376	1	ko00534
124	Maturity onset diabetes of the young	26	26	0.71376	1	ko04950
125	Glycolysis / Gluconeogenesis	81	82	0.71509	1	ko00010
126	Glycosphingolipid biosynthesis - lacto and neolacto series	25	25	0.723085	1	ko00601
127	Biosynthesis of unsaturated fatty acids	25	25	0.723085	1	ko01040
128	Endometrial cancer	79	80	0.724642	1	ko05213
129	Intestinal immune network for IgA production	79	80	0.724642	1	ko04672
130	Spliceosome	203	206	0.725652	1	ko03040
131	Gap junction	138	140	0.730573	1	ko04540
132	Glyoxylate and dicarboxylate metabolism	24	24	0.732532	1	ko00630
133	Huntington's disease	264	268	0.736407	1	ko05016
134	Rheumatoid arthritis	135	137	0.741002	1	ko05323
135	Chloroalkane and chloroalkene degradation	23	23	0.742101	1	ko00625
136	Hedgehog signaling pathway	75	76	0.743759	1	ko04340
137	Vibrio cholerae infection	134	136	0.744466	1	ko05110
138	Jak-STAT signaling pathway	196	199	0.745506	1	ko04630
139	Ascorbate and aldarate metabolism	22	22	0.751795	1	ko00053
140	Hepatitis C	191	194	0.759493	1	ko05160
141	Focal adhesion	452	459	0.759678	1	ko04510
142	Renin-angiotensin system	21	21	0.761615	1	ko04614
143	Steroid biosynthesis	21	21	0.761615	1	ko00100
144	Mismatch repair	21	21	0.761615	1	ko03430
145	Carbon fixation pathways in prokaryotes	21	21	0.761615	1	ko00720
146	One carbon pool by folate	21	21	0.761615	1	ko00670
147	Pyrimidine metabolism	128	130	0.765096	1	ko00240
148	Non-homologous end-joining	20	20	0.771562	1	ko03450
149	Other glycan degradation	19	19	0.781638	1	ko00511
150	Metabolism of xenobiotics by cytochrome P450	67	68	0.781853	1	ko00980
151	Long-term depression	123	125	0.782043	1	ko04730
152	Drug metabolism - cytochrome P450	66	67	0.786583	1	ko00982
153	African trypanosomiasis	66	67	0.786583	1	ko05143
154	Protein processing in endoplasmic reticulum	242	246	0.788644	1	ko04141
155	Neurotrophin signaling pathway	241	245	0.790934	1	ko04722
156	Arginine and proline metabolism	65	66	0.791304	1	ko00330
157	Bisphenol degradation	18	18	0.791846	1	ko00363
158	Hematopoietic cell lineage	120	122	0.792083	1	ko04640
159	Fatty acid metabolism	64	65	0.796013	1	ko00071
160	Ether lipid metabolism	63	64	0.80071	1	ko00565
161	TGF-beta signaling pathway	116	118	0.805297	1	ko04350
162	Nucleotide excision repair	62	63	0.805394	1	ko03420
163	Adipocytokine signaling pathway	115	117	0.808566	1	ko04920
164	Tryptophan metabolism	61	62	0.810063	1	ko00380
165	Peroxisome	114	116	0.811822	1	ko04146
166	Selenocompound metabolism	16	16	0.81266	1	ko00450
167	Benzoate degradation	16	16	0.81266	1	ko00362
168	Phenylalanine, tyrosine and tryptophan biosynthesis	16	16	0.81266	1	ko00400
169	Circadian rhythm - fly	16	16	0.81266	1	ko04711
170	Dorso-ventral axis formation	60	61	0.814716	1	ko04320
171	Asthma	59	60	0.819352	1	ko05310
172	Riboflavin metabolism	15	15	0.82327	1	ko00740
173	Sulfur relay system	15	15	0.82327	1	ko04122
174	Starch and sucrose metabolism	57	58	0.828568	1	ko00500
175	Other types of O-glycan biosynthesis	57	58	0.828568	1	ko00514
176	Glycosphingolipid biosynthesis - globo series	14	14	0.834018	1	ko00603
177	Glycosaminoglycan biosynthesis - keratan sulfate	14	14	0.834018	1	ko00533
178	Isoquinoline alkaloid biosynthesis	14	14	0.834018	1	ko00950
179	Sphingolipid metabolism	55	56	0.837702	1	ko00600
180	Regulation of autophagy	54	55	0.842234	1	ko04140
181	Polycyclic aromatic hydrocarbon degradation	13	13	0.844906	1	ko00624
182	Fatty acid biosynthesis	13	13	0.844906	1	ko00061
183	ErbB signaling pathway	157	160	0.848241	1	ko04012
184	Proteasome	52	53	0.851223	1	ko03050
185	Cytosolic DNA-sensing pathway	100	102	0.855653	1	ko04623
186	Valine, leucine and isoleucine biosynthesis	12	12	0.855935	1	ko00290
187	Synthesis and degradation of ketone bodies	12	12	0.855935	1	ko00072
188	Streptomycin biosynthesis	11	11	0.867107	1	ko00521
189	Terpenoid backbone biosynthesis	11	11	0.867107	1	ko00900
190	Ubiquinone and other terpenoid-quinone biosynthesis	11	11	0.867107	1	ko00130
191	Tropane, piperidine and pyridine alkaloid biosynthesis	11	11	0.867107	1	ko00960
192	Fatty acid elongation in mitochondria	11	11	0.867107	1	ko00062
193	Cell cycle	147	150	0.871483	1	ko04110
194	Oxidative phosphorylation	147	150	0.871483	1	ko00190
195	Linoleic acid metabolism	47	48	0.873186	1	ko00591
196	Acute myeloid leukemia	94	96	0.873256	1	ko05221
197	Aldosterone-regulated sodium reabsorption	94	96	0.873256	1	ko04960
198	Limonene and pinene degradation	10	10	0.878425	1	ko00903
199	Taurine and hypotaurine metabolism	10	10	0.878425	1	ko00430
200	Sulfur metabolism	10	10	0.878425	1	ko00920
201	Caffeine metabolism	10	10	0.878425	1	ko00232
202	MAPK signaling pathway - yeast	45	46	0.881735	1	ko04011
203	Melanoma	90	92	0.884527	1	ko05218
204	Small cell lung cancer	139	142	0.888892	1	ko05222
205	Phototransduction - fly	88	90	0.890012	1	ko04745
206	Chemokine signaling pathway	245	250	0.895532	1	ko04062
207	Long-term potentiation	135	138	0.897171	1	ko04720
208	Taste transduction	41	42	0.898355	1	ko04742
209	Two-component system	8	8	0.901502	1	ko02020
210	Atrazine degradation	8	8	0.901502	1	ko00791
211	Natural killer cell mediated cytotoxicity	185	189	0.902501	1	ko04650
212	Homologous recombination	38	39	0.910347	1	ko03440
213	Toxoplasmosis	180	184	0.910537	1	ko05145
214	Cell cycle - Caulobacter	7	7	0.913266	1	ko04112
215	Methane metabolism	35	36	0.921875	1	ko00680
216	Pathways in cancer	512	522	0.92509	1	ko05200
217	Caprolactam degradation	6	6	0.925182	1	ko00930
218	Thiamine metabolism	6	6	0.925182	1	ko00730
219	ECM-receptor interaction	223	228	0.925279	1	ko04512
220	Phototransduction	74	76	0.925284	1	ko04744
221	Parkinson's disease	170	174	0.925516	1	ko05012
222	SNARE interactions in vesicular transport	34	35	0.925605	1	ko04130
223	Vasopressin-regulated water reabsorption	72	74	0.929836	1	ko04962
224	Measles	214	219	0.935848	1	ko05162
225	Calcium signaling pathway	323	330	0.936099	1	ko04020
226	Phenylalanine metabolism	31	32	0.936429	1	ko00360
227	Butirosin and neomycin biosynthesis	5	5	0.937253	1	ko00524
228	Collecting duct acid secretion	30	31	0.939907	1	ko04966
229	D-Glutamine and D-glutamate metabolism	4	4	0.949481	1	ko00471
230	Naphthalene degradation	4	4	0.949481	1	ko00626
231	Betalain biosynthesis	4	4	0.949481	1	ko00965
232	Vitamin B6 metabolism	4	4	0.949481	1	ko00750
233	Pancreatic cancer	103	106	0.951949	1	ko05212
234	Fructose and mannose metabolism	59	61	0.956118	1	ko00051
235	MAPK signaling pathway - fly	25	26	0.956221	1	ko04013
236	Bladder cancer	58	60	0.95789	1	ko05219
237	Protein export	24	25	0.95925	1	ko03060
238	Bacterial secretion system	3	3	0.961868	1	ko03070
239	Ethylbenzene degradation	3	3	0.961868	1	ko00642
240	Phenylpropanoid biosynthesis	3	3	0.961868	1	ko00940
241	Geraniol degradation	3	3	0.961868	1	ko00281
242	Lysine biosynthesis	3	3	0.961868	1	ko00300
243	Circadian rhythm - plant	3	3	0.961868	1	ko04712
244	Phosphonate and phosphinate metabolism	3	3	0.961868	1	ko00440
245	Novobiocin biosynthesis	3	3	0.961868	1	ko00401
246	Alzheimer's disease	235	241	0.963377	1	ko05010
247	Salivary secretion	184	189	0.964327	1	ko04970
248	Vitamin digestion and absorption	51	53	0.969248	1	ko04977
249	Aminobenzoate degradation	20	21	0.970507	1	ko00627
250	RNA polymerase	50	52	0.970719	1	ko03020
251	Glioma	127	131	0.972788	1	ko05214
252	Flagellar assembly	2	2	0.974415	1	ko02040
253	Biotin metabolism	2	2	0.974415	1	ko00780
254	Nitrotoluene degradation	2	2	0.974415	1	ko00633
255	Flavone and flavonol biosynthesis	2	2	0.974415	1	ko00944
256	Indole alkaloid biosynthesis	2	2	0.974415	1	ko00901
257	Apoptosis	118	122	0.979236	1	ko04210
258	Chronic myeloid leukemia	118	122	0.979236	1	ko05220
259	Glycosphingolipid biosynthesis - ganglio series	15	16	0.982425	1	ko00604
260	Retinol metabolism	71	74	0.984782	1	ko00830
261	Lipoic acid metabolism	1	1	0.987125	1	ko00785
262	D-Arginine and D-ornithine metabolism	1	1	0.987125	1	ko00472
263	Biosynthesis of vancomycin group antibiotics	1	1	0.987125	1	ko01055
264	Zeatin biosynthesis	1	1	0.987125	1	ko00908
265	Polyketide sugar unit biosynthesis	1	1	0.987125	1	ko00523
266	Penicillin and cephalosporin biosynthesis	1	1	0.987125	1	ko00311
267	Systemic lupus erythematosus	233	240	0.987382	1	ko05322
268	Folate biosynthesis	12	13	0.988284	1	ko00790
269	Non-small cell lung cancer	94	98	0.991312	1	ko05223
270	Amyotrophic lateral sclerosis (ALS)	94	98	0.991312	1	ko05014
271	Cyanoamino acid metabolism	8	9	0.994406	1	ko00460
272	p53 signaling pathway	118	123	0.994842	1	ko04115
273	Styrene degradation	3	4	0.999027	1	ko00643
274	PPAR signaling pathway	148	156	0.999811	1	ko03320
275	Ribosome	215	229	1	1	ko03010
